# Supplementary material
Source: PubMed Central journal article supplement (PMC6690358)

## SUPPLEMENTAL FIGURE LEGENDS

**Figure S1, Related to figure 1-2. AGO2 is nuclear in stem cells and progenitor cells.** **A**, Satellite cell isolation by Florescence-activated cell sorting (FACS). VCAM1 positive and Pacific Blue labeled Sca1, APC labeled CD31/CD45, and Sytox Green negative cell population were sorted. **B**, AGO1-4 immunoblots in doxycycline induced and uninduced AGO1-4<sup>-/-</sup> whole cell lysates. GAPDH serves as loading control. Note that ab57113 recognizes an unknown nuclear antigen at ~100 kDa. **C**, AGO1-4 immunoblots in AGO2<sup>-/-</sup> mouse embryonic fibroblasts (MEFs). GAPDH serves as loading control. **D**, Immunofluorescence staining of doxycycline induced and uninduced AGO1-4<sup>-/-</sup> cells using anti-FLAG and anti-AGO2 11A9 antibody (Millipore). Dapi stains the DNA. **E**, AGO2 immunofluorescence staining in a panel of human and murine cell lines. hMB: human skeletal muscle cells, iPSC: cell line NTCR-5. Phalloidin stained for F-actin, Dapi stained for DNA and HIST3H3 stained for chromatin. **F**, Autoradiograph of a denaturing polyacrylamide gel fractionating radiolabeled RNAs recovered from FLAG-IP from whole cell lysates of AGO1-4<sup>-/-</sup> and AGO1-4<sup>-/-</sup> transiently expressing WT-AGO2, as well as cytoplasmic and nuclear AGO1-4<sup>-/-</sup> ESC fractions overexpressing NLS-AGO2. **G**, Schematic representation of experimental setup for Figure 2F.

**Figure S2, Related to figure 3. AGO2 is loaded with mature miRNA in the nucleus.** **A**, Immunoblot for FLAG-AGO2 controlling for IP with Pan-AGO affinity peptide-IP (WT) and Control (Ctrl.) peptides in cytoplasmic and nuclear fractionation from 2 day differentiated myocytes. **B**, Autoradiograph of a denaturing polyacrylamide gel fractionating radiolabeled RNAs recovered from Pan-AGO affinity peptide-IP (WT) and Control (Ctrl.) peptides from the cytoplasmic and nuclear fractions of 2 day differentiated myocyte lysates. The lower panel shows immunoblots for FLAG-AGO2 controlling for IP. **C**, Scatterplot comparing the cytoplasmic and the nuclear miRNA profiles from 2 day differentiated myocytes.

**Figure S3, Related to figure 4. Nuclear AGO2 binds thousands of different mRNAs target.** **A**, Autoradiograph of crosslinked and radiolabeled Pan-AGO affinity peptide-IP ribonucleoprotein separated by SDS-PAGE. The lower panel shows immunoblots for FLAG-AGO2 controlling for IP, as well as CALR and LMNA controlling for cellular fractionations. **B**, Distribution of PAR-CLIP sequence reads across target mRNA 3'UTR, coding sequence, 5'UTR, and introns. **C**, Cumulative distribution function of the conservation score of AGO2 intronic binding sites (red line) compared to a cohort of five expression matched (blue line, left panel) or a cohort of five expression and di-nucleotide composition matched (blue line, right panel) background sets of random intronic sequences. The table indicates details for each cohort of background sets, including p-values calculated by Mann-Whitney U-test compared to intronic PAR-CLIP sites. **D**, Enrichment of seed complementary sequence for the top 9 most abundant miRNAs in AGO1-4<sup>-/-</sup>-FHAGO2 cells across target mRNA clusters in 3'UTR, coding and intronic sequence in

cytoplasmic (top) and nuclear (bottom) PAR-CLIP binding sites. Position 0 indicates the predominant T-to-C transition in target mRNA clusters.

**Figure S4, Related to figure 5. AGO2 destabilizes RNA targets in the nucleoplasm.** **A**, mRNA expression changes upon AGO2 induction in AGO1-4<sup>-/-</sup>-FHAGO2 ESCs determined by RNAseq from total fraction. The cumulative distribution of cytoplasmic AGO2 PAR-CLIP targets binned by number of binding sites compared non-AGO2 targets. *P*-values are determined by Mann-Whitney U-test. **B**, mRNA expression changes upon AGO2 induction in AGO1-4<sup>-/-</sup>-FHAGO2 ESCs determined by RNAseq from nuclear fraction. The cumulative distribution of nuclear AGO2 PAR-CLIP targets binned by number of binding sites compared non-AGO2 targets. *P*-values are determined by Mann-Whitney U-test. **C**, Cumulative distribution of abundance changes in RNA extracted from the chromatin fraction upon AGO2 induction in AGO1-4<sup>-/-</sup>-FHAGO2 ESCs determined by RNAseq. Nuclear AGO2 PAR-CLIP targets binned by number of binding sites compared non-AGO2 targets. *P*-values were determined by Mann-Whitney U-test. **D**, Cumulative distribution of abundance changes in cytoplasmic RNA upon AGO2 induction in AGO1-4<sup>-/-</sup>-FHAGO2 ESCs determined by RNAseq. Nuclear AGO2 PAR-CLIP targets were binned by the presence of binding sites exclusively in the 3'UTR, CDS, or intron and compared to non-targets. *P*-values were determined by Mann-Whitney U-test. **E**, AGO2 immunoblots from cytoplasmic and nuclear lysates after miR-16 transfection. The endoplasmic reticulum protein CALR served as cytoplasmic marker and LMNA served as nuclear markers. **F**, Relative read frequency of before and after miR-16 transfection determined by small RNA sequencing. **G**, Cumulative distribution of abundance changes in cytoplasmic RNA upon miR-16 introduction into AGO1-4<sup>-/-</sup>-FHAGO2 ESCs. Experimentally determined miR-16 target sites were downloaded from miRdb.org and binned according to binding in 3'UTR and CDS.

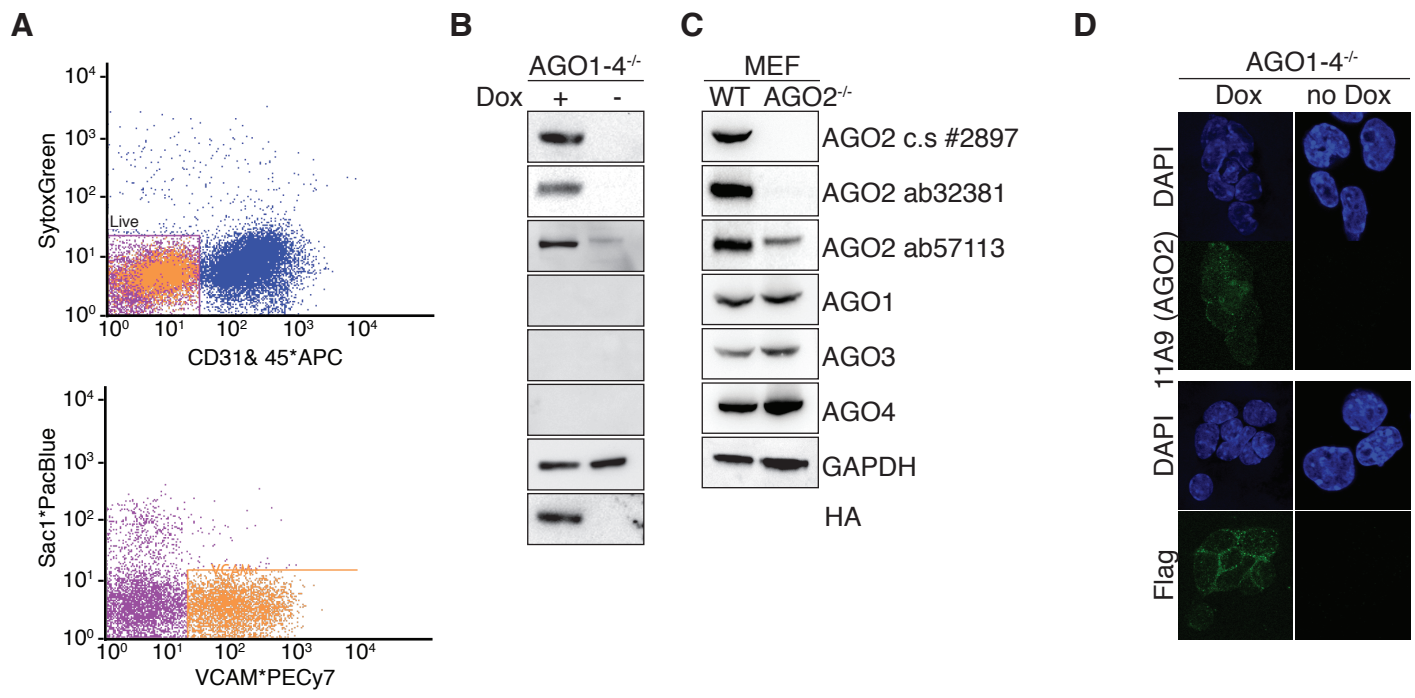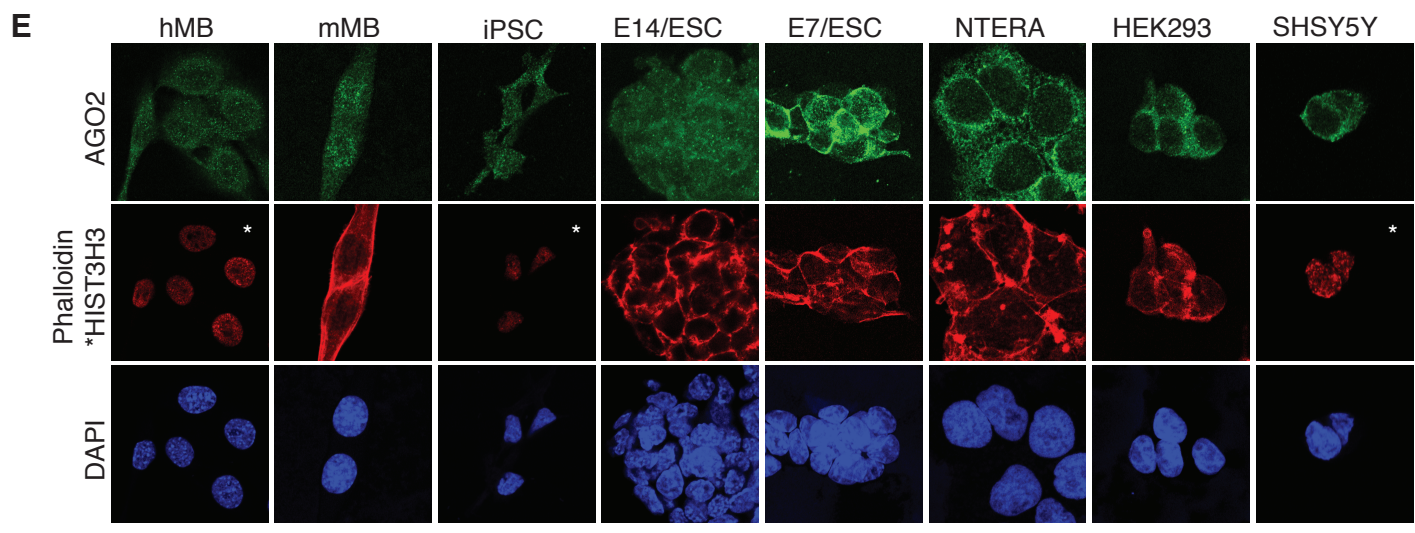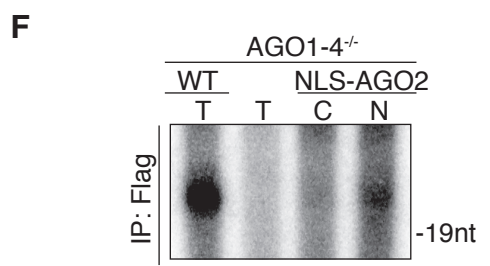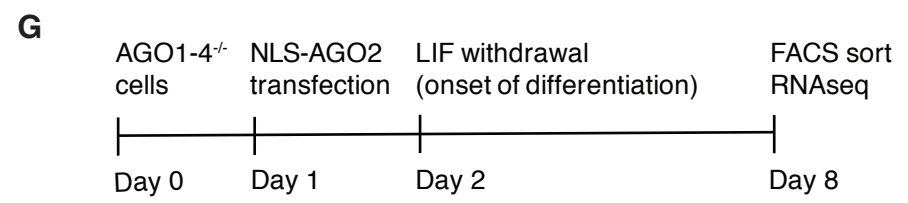

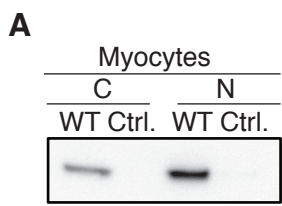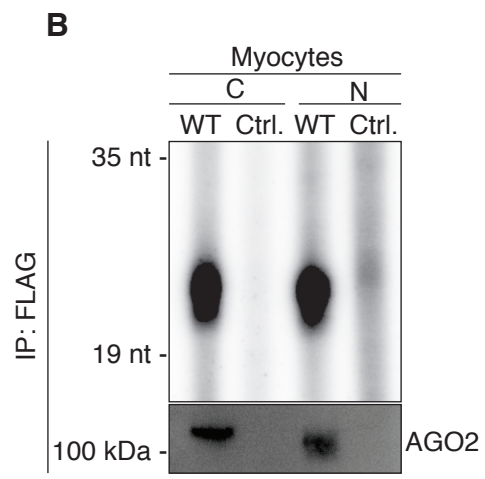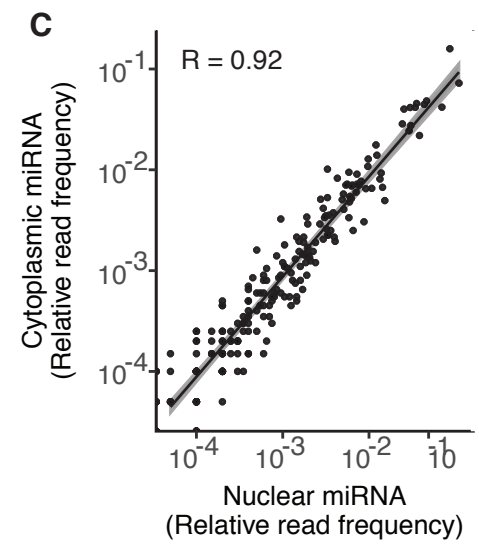

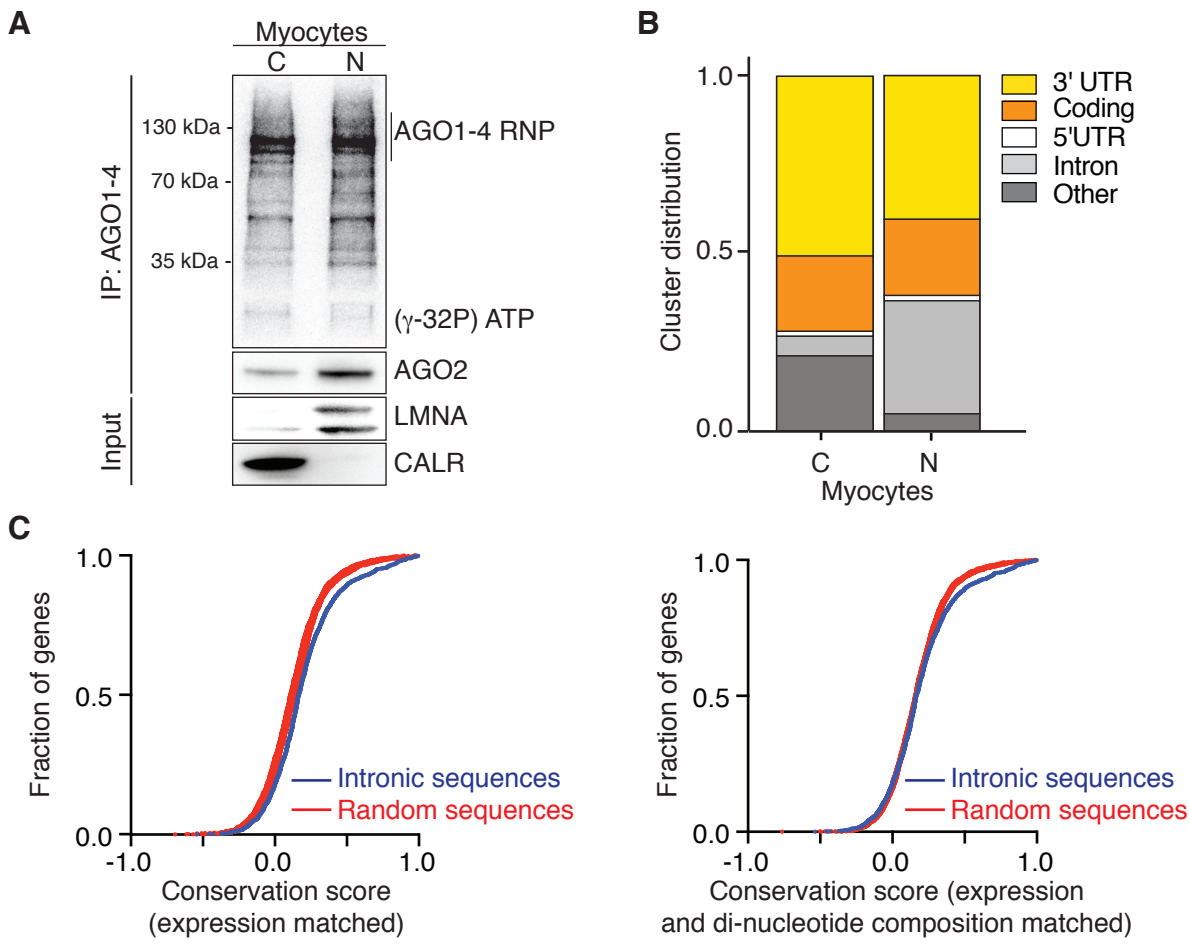

|                                                         | Sequences                   | Lifted to hg38 | Mean conservation score | p-value against random sequence set |
|---------------------------------------------------------|-----------------------------|----------------|-------------------------|-------------------------------------|
| <b>Source of random seqs</b>                            | <b>Intron binding sites</b> | <b>1459</b>    | <b>0.203</b>            | <b>---</b>                          |
| <b>Expression matched</b>                               | Random set 1                | 1117           | 0.147                   | 1.75E-07                            |
|                                                         | Random set 2                | 1180           | 0.127                   | 3.39E-16                            |
|                                                         | Random set 3                | 1164           | 0.133                   | 1.24E-14                            |
|                                                         | Random set 4                | 1131           | 0.135                   | 4.84E-13                            |
|                                                         | Random set 5                | 1177           | 0.131                   | 2.97E-14                            |
| <b>Expression and di-nucleotide composition matched</b> | Random set 1                | 1372           | 0.176                   | 0.049                               |
|                                                         | Random set 2                | 1399           | 0.177                   | 0.034                               |
|                                                         | Random set 3                | 1335           | 0.176                   | 0.026                               |
|                                                         | Random set 4                | 1387           | 0.179                   | 0.077                               |
|                                                         | Random set 5                | 1363           | 0.178                   | 0.035                               |

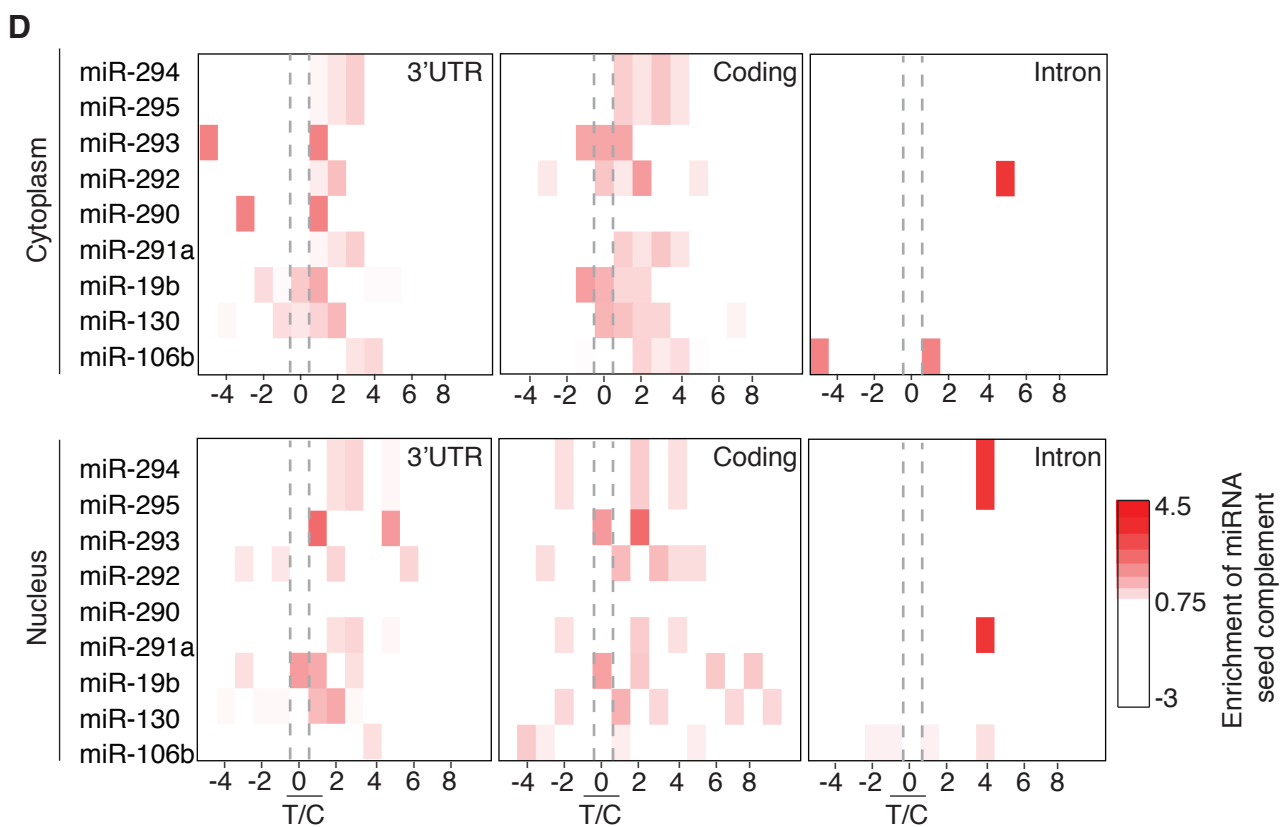

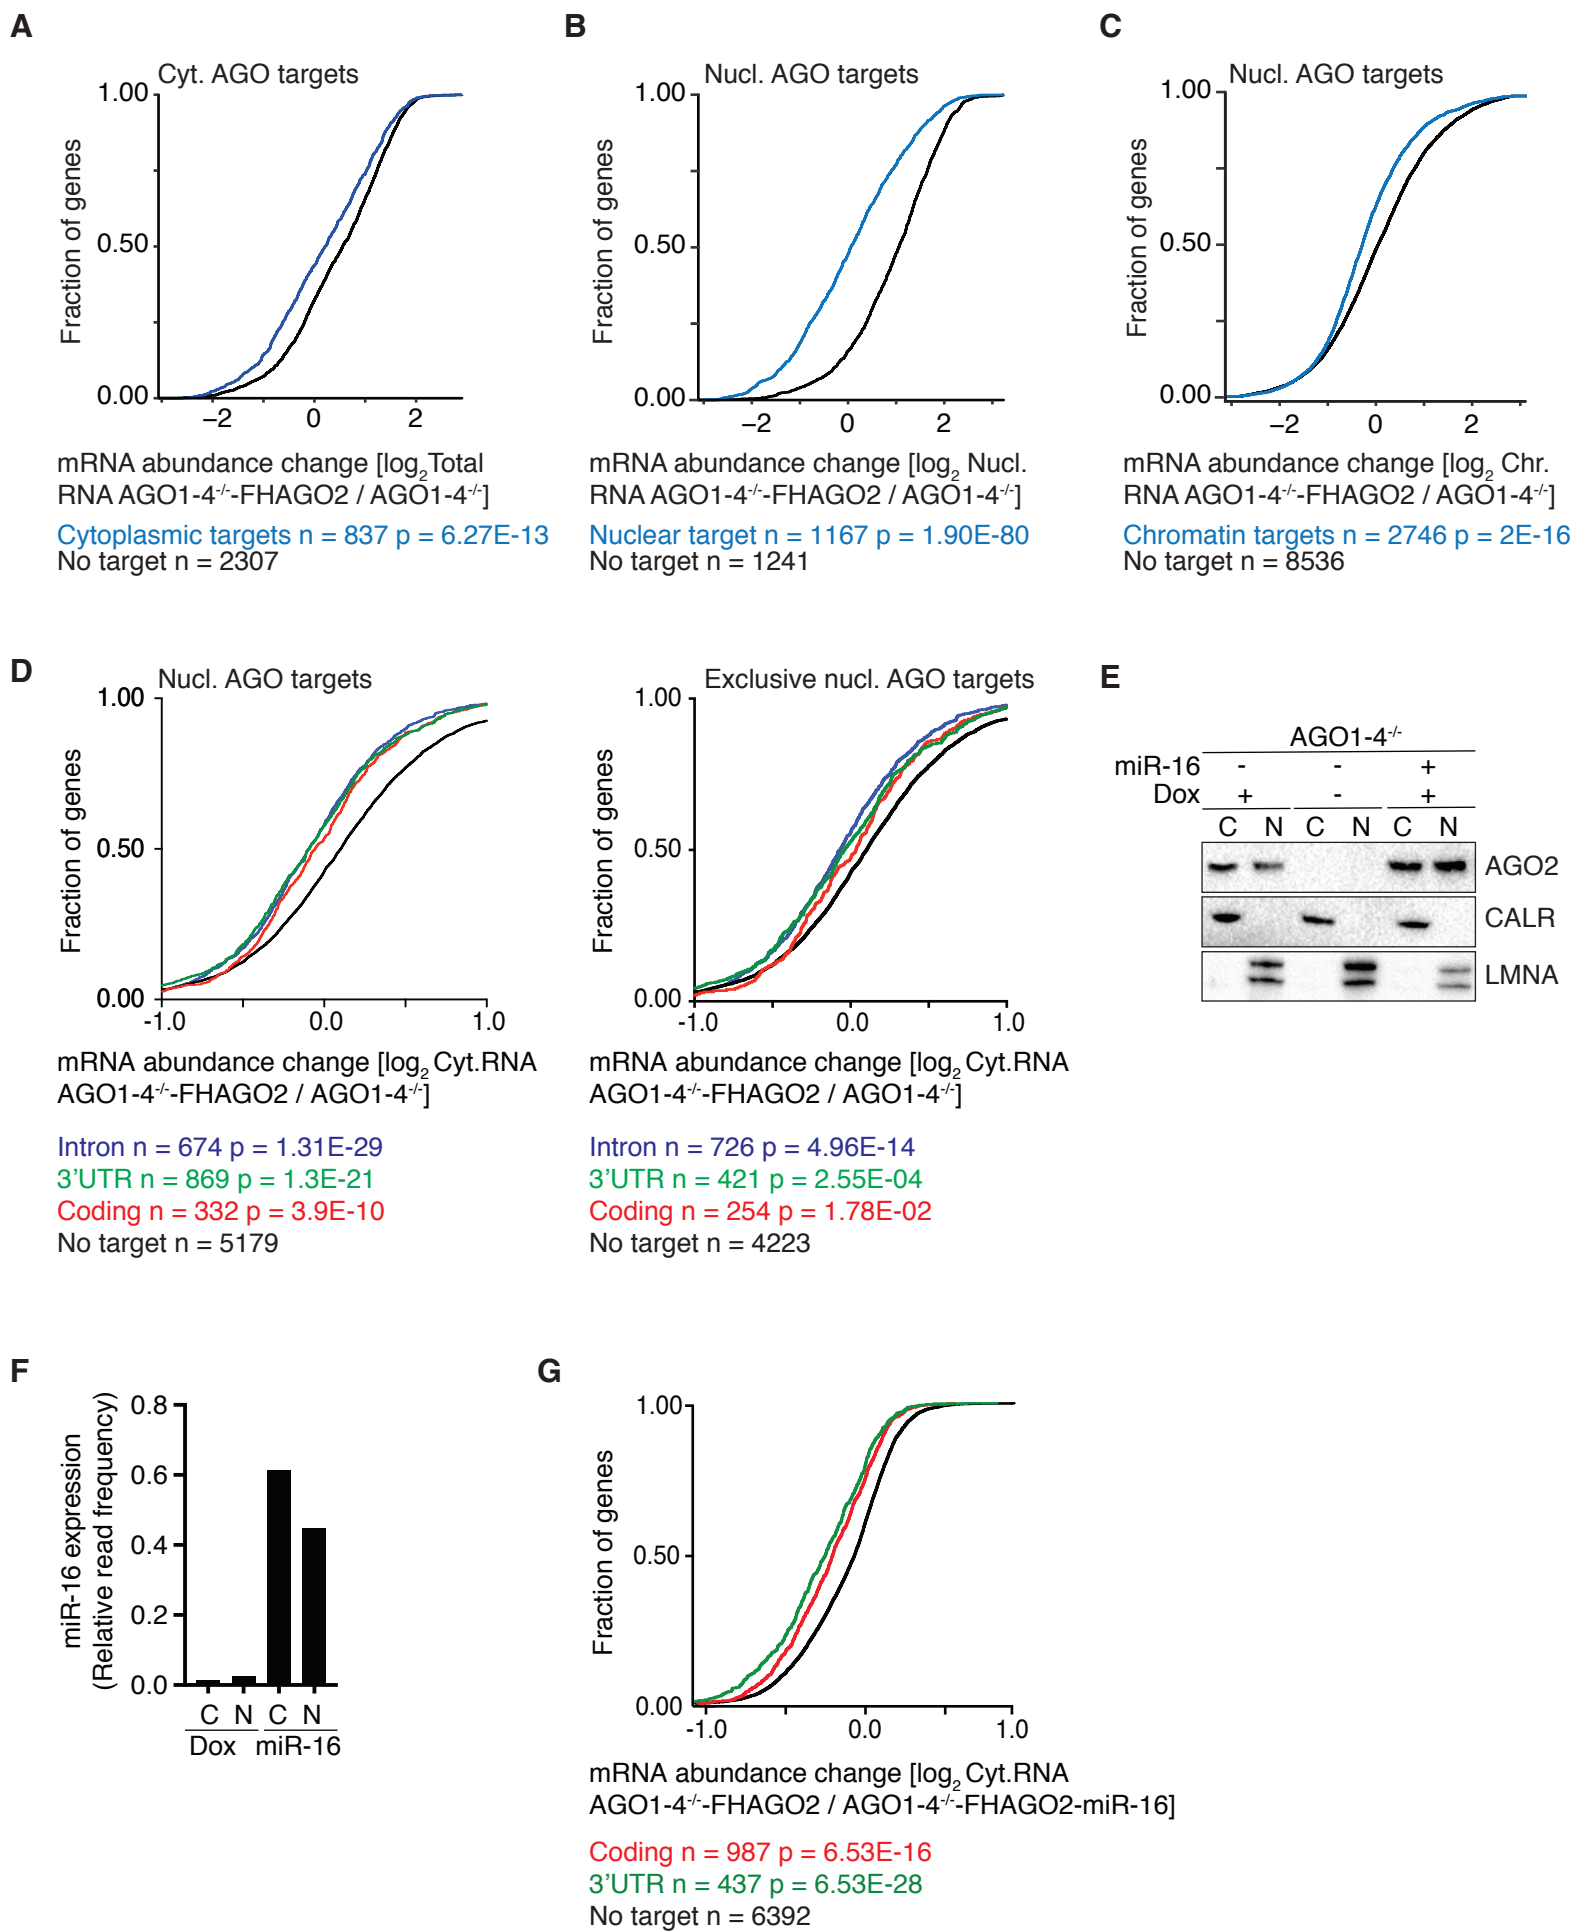

Supplement: NIHMS1043141-supplement-FigsS1-S4.pdf [file NIHMS1043141-supplement-FigsS1-S4.pdf]
